# Supplementary material for: Pterocarpan synthase (PTS) structures suggest a common quinone methide–stabilizing function in dirigent proteins and proteins with dirigent-like domains
Source: PubMed Central journal article supplement (PMC7450108; doi:10.1074/jbc.ra120.012444), 2020-06-21
Supplement: supp_RA120.012444_157926_2_supp_550148_qc35bs.pdf [file supp_RA120.012444_157926_2_supp_550148_qc35bs.pdf]

## Supporting Information

### *NMR experimental parameters*

NMR spectra were recorded on a Varian VNMRs spectrometer operating at 599.64 and 150.79 MHz for  $^1\text{H}$  and  $^{13}\text{C}$ , respectively, and equipped with a 5 mm HCN cryoprobe (Varian) with cold carbon preamp and a z-axis gradient. The sample temperature was maintained at 20 °C for all experiments. Chemical shifts were referenced internally to the solvent methanol- $d_4$  (3.31 ppm for the residual methyl proton and 49.15 ppm for C). 1D  $^1\text{H}$  spectra having a spectral width of 11.1 ppm were acquired with 8 transients each using a full 90° pulse, acquisition time of 4 s (27k complex points zero-filled to 128k), and relaxation delay of 10 s.  $^{13}\text{C}$  1D spectra were acquired with a 250 ppm spectral width using 45° flip-angle pulses, 0.87 s acquisition time (32k complex points, zero-filled to 128k points), and 2 s relaxation delay. Acquisition of 1024 (*trans*-DMI) or 2048 (*cis*-DMI) transients co-added for each spectrum was preceded by 8 steady-state scans, broadband, power-gated  $^1\text{H}$  decoupling was accomplished using the WALTZ-16 composite pulse decoupling scheme, and 1 Hz line-broadening was applied during processing. All 2D experiments had 32 steady-state scans applied prior to acquisition and incorporated default forward linear prediction during processing. 2D multiplicity-edited gHSQCAD experiments had spectral widths of 11.0 and 120.0 ppm in the direct and indirect dimensions, respectively, and were acquired with 16 transients (acquisition time of 0.15 s, 1036 complex points), with a relaxation delay of 1.2 s, for each of 196 increments comprising the indirect dimension. A one-bond  $^1J_{\text{CH}}$  of 146 Hz was used. Broadband  $^{13}\text{C}$  decoupling using the WURST composite pulse decoupling scheme was active during acquisition. Both dimensions were zero-filled to a final size of 2,048 points and subjected to a Gaussian apodization function. The gHMBCAD experiments had spectral widths of 16.0 and 160.0 ppm in the direct and indirect dimensions respectively and were acquired with 32 transients (acquisition time of 0.15 s, 1,442 points), with a 1.2 s relaxation delay, for each of the 200 increments acquired in the indirect dimension. A multiple-bond coupling constant of 8 Hz was used as well as one-bond suppression for  $^1J_{\text{CH}}$  in the 130 – 165 Hz range. Each dimension was zero-filled to 2,048 points, sine bell and Gaussian apodization were applied in the direct and indirect dimensions respectively. The gCOSY spectra were acquired with a 10.0 ppm spectral width in both dimensions, only 1 transient (acquisition time of 0.3 s, 1,803 points) was acquired for each of 256 increments in the indirect dimension with a relaxation delay of 1 s. Post-acquisition processing included zero-filling to 2,048 points and sine bell apodization in both dimensions. For the *cis*-DMI sample, a HOMO2DJ experiment was also acquired to aid in resolving the peak positions and J-coupling on a multiplet region centered at 6.39 ppm (see spectra in Figures S8 and S10). The HOMO2DJ experiment consisted of spectral widths of 16.0 ppm and 64 Hz in the direct and indirect dimensions respectively and was acquired with 4 transients per each of the 80 indirect dimension increments with an acquisition time of 1.25 s (12,019 complex points) and using a relaxation delay of 2 s. Post-acquisition processing included zero-filling to a final data size of 16,384 and 512 complex points in the direct and indirect dimensions, application of a sine bell apodization function in both dimensions and, finally, subjected to a 45° tilt and was symmetrized.

**Table S1**Structural superpositions<sup>a</sup>

|        | PsPTS1                                              | GePTS1                                               | DRR206                                               | AtDIR6                     |
|--------|-----------------------------------------------------|------------------------------------------------------|------------------------------------------------------|----------------------------|
| PsPTS1 | –                                                   | 0.6 (152 core C $\alpha$ )                           | 1.6 (111 core C $\alpha$ )                           | 1.4 (135 core C $\alpha$ ) |
| GePTS1 | 0.6 (456 core C $\alpha$ )<br>1.5 (all C $\alpha$ ) | –                                                    | 1.5 (113 core C $\alpha$ )                           | 1.4 (135 core C $\alpha$ ) |
| DRR206 | 1.7 (335 core C $\alpha$ )<br>9.0 (all C $\alpha$ ) | 1.7 (341 core C $\alpha$ )<br>10.2 (all C $\alpha$ ) | –                                                    | 1.7 (117 core C $\alpha$ ) |
| AtDIR6 | 1.5 (408 core C $\alpha$ )<br>4.0 (all C $\alpha$ ) | 1.5 (404 core C $\alpha$ )<br>7.1 (all C $\alpha$ )  | 1.8 (251 core C $\alpha$ ),<br>6.6 (all C $\alpha$ ) | –                          |

<sup>a</sup> The upper sector shows the superpositions of individual monomers. Values given are averages over all the molecules in the asymmetric unit. The lower section pertains to the trimeric structure superpositions. The *rmsd* values are in Å and the number of C $\alpha$  positions is given in parentheses for the matched core atoms from SSM, or for all C $\alpha$  atoms using ICM-Pro.

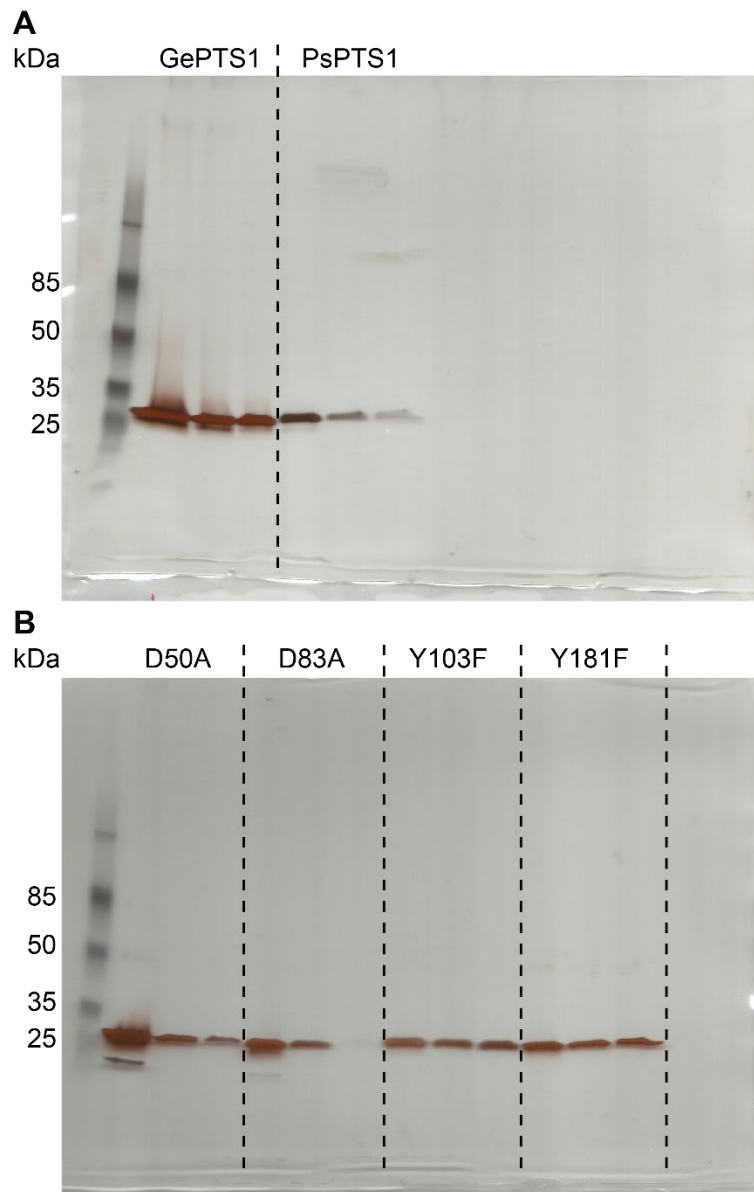

**Figure S1.** Purification of PTSs. *A*, GePTS1 and PsPTS1. *B*, GePTS1 mutants, D50A, D83A, Y103F and Y181F. The three lanes for each protein show elution with 300 mM imidazole ( $3 \times 500 \mu\text{l}$ ).

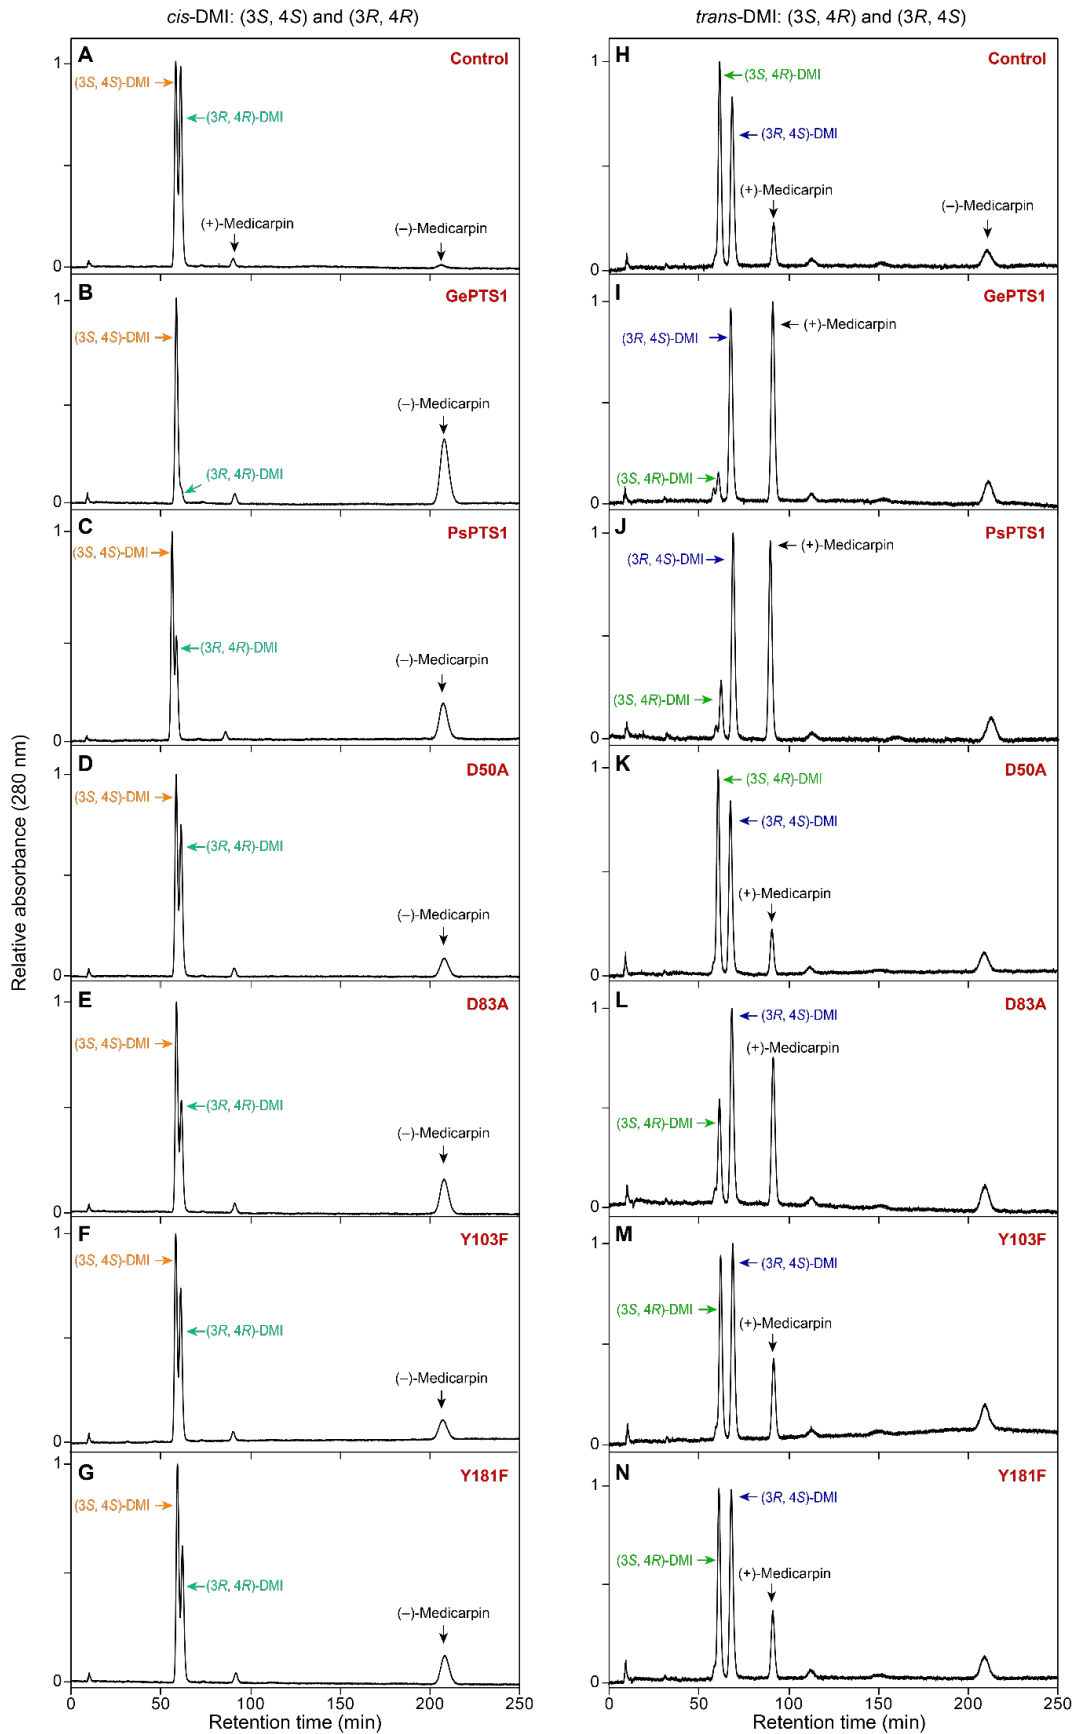

**Figure S2. Medicarpin formation from *cis*-DMI ((3*R*,4*R*) and (3*S*,4*S*)) and *trans*-DMI ((3*S*,4*R*) and (3*R*,4*S*)).** *A* and *H*, control (no dirigent protein) with *cis*-DMI ((3*R*,4*R*) and (3*S*,4*S*)) and *trans*-DMI ((3*S*,4*R*) and (3*R*,4*S*)), respectively. Following a 30 minute incubation, both (+)- and (–)-medicarpins formed non-enzymatically in small amount. *B* – *G*, incubation of *cis*-DMI ((3*R*,4*R*) and (3*S*,4*S*)) with GePTS1 (10 ng; *B*), PsPTS1 (10 ng; *C*), and GePTS1 mutants: D50A (1 μg; *D*), D83A (100 ng; *E*), Y103F (100 ng; *F*) and Y181F (100 ng; *G*). Following 30 minute incubation, depletion of (3*R*,4*R*)-DMI and formation of (–)-medicarpin is observed in each case. *I* – *N*, incubation of *trans*-DMI ((3*S*,4*R*) and (3*R*,4*S*)) with GePTS1 (500 ng; *I*), PsPTS1 (1 μg; *J*), and GePTS1 mutants: D50A (1 μg; *K*), D83A (1 μg; *L*), Y103F (1 μg; *M*) and Y181F (500 ng; *N*). Following 30 minute incubation, depletion of (3*S*,4*R*)-DMI and formation of (+)-medicarpin is observed in each case.

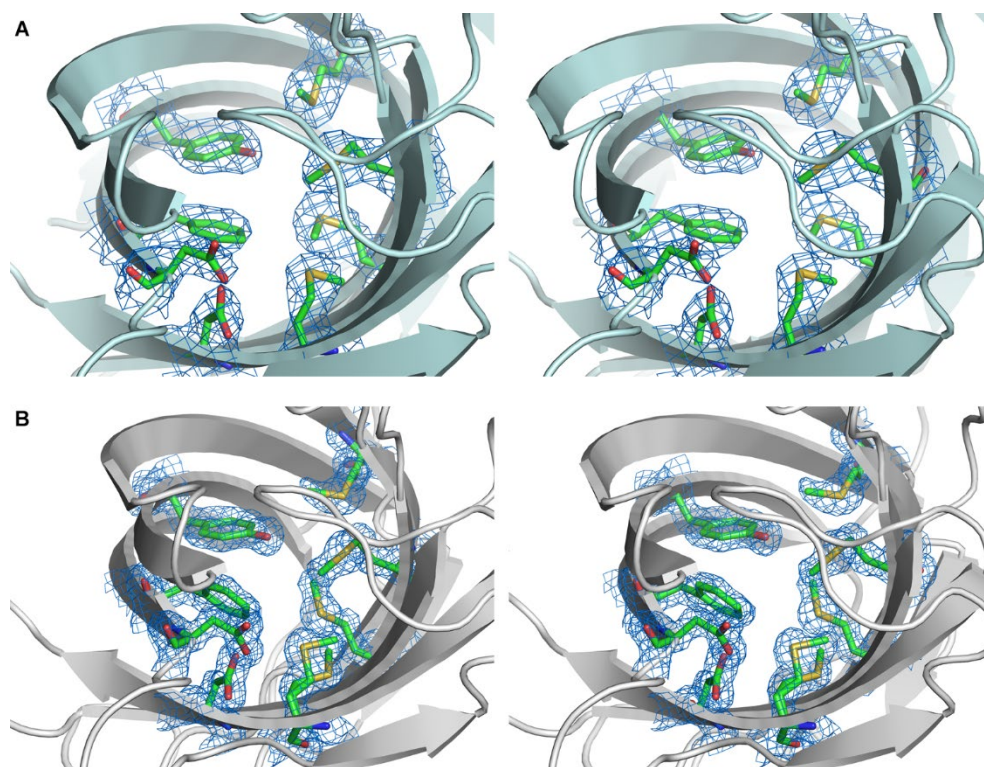

**Figure S3. Electron density map.** Final  $2F_o - F_c$  electron density (blue mesh, contoured at  $1\sigma$ ) for (A) GePTS1 and (B) PsPTS1 showing part of the map near the putative substrate binding site.

MTYYQSMSPTVLGFQEEKFTHLHFYFHDVVTGPKPSMVIVA  
EPNGKAKNSLPFGTVVAMDDPLTVGPESDSKLVGKAQGIYT  
SISQEEMGLMMVMTMAFSDGEFNGSTLSILARNMIMSEPVR  
EMAIVGGTGAFRFARGYAQAKFYSVDFTKGDATIVEYDIFVF  
HY**KGELNSKLEGKPIPNPLGLDSTRTGHHHHH**

**Figure S4. GePTS1 sequence.** The C-terminus His-Tag linker is in bold red.

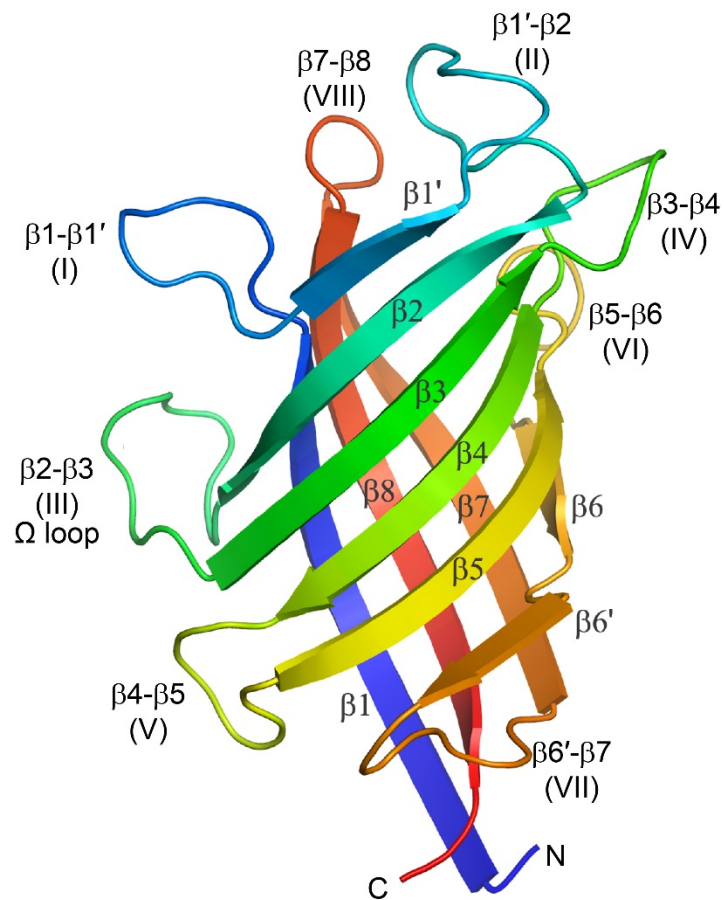

**Figure S5. Structure of the PsPTS1 monomers.** Ribbon representation of PsPTS1 rainbow colored from the N-terminus (blue) to the C-terminus (red). The  $\beta$ -strands are labeled the same as for the GePTS1 monomer (Fig. 5). The  $\Omega$ -loop is indicated, and the loops surrounding the active site opening are at the top of the barrel.



-----  
*predicted signal peptide*  
 -----

F48 D50

GePTS1 MAKSTFFIISLTL---PFLLL--SVVTATYYQSMSPVTLGFQEEKFTLHFFHHVVTGPKESMVIVA--EPNGKAKNS 72  
 PsPTS1 MAKSSSFFITF-----FISLISFATATKYQSLSPMLGFQEEKFTLHFFHHVVTGPKESMVIVA--EPNGKAVNA 71  
 PsPTS2 MSNSK-----TFLSLTFEFTLFFSFVNATYYQDISPFLGFQEEKFTLHFFHHVVTGPKETMIASESPLNGKSESP 75  
 CaPTS1 MAKSSSSSIT---VFVTFI.FITL.ATATNYYQSI.SPTMI.GFQEKI.THI.HFY.HH.VVTGPKESMVIVA--EPNGRAKST 74  
 GmPTS1 MAKS-----TFFVCLNLSL---FSLVATYYSSITPTL.LGFREKFTLHFFHHVVTGPKESMVIVA--EPNGKAKDA 70  
 GmPTS2 MAKS-----TFFVCLNLSL---FSLVATYYSSITPTL.LGFREKFTLHFFHHVVTGPKESMVIVA--EPNGKAKDA 70  
 GmPTS3 MAKS-----TFFVCLNLSL---FSLVATYYSSITPTL.LGFREKFTLHFFHHVVTGPKESMVIVA--EPNGKAKDA 70  
 GmPTS4 MAKS-----TFFVCLNLSL---FSLVATYYSSITPTL.LGFNEEKFTLHFFHHVVTGPKESMVIVA--EPNGKAKDA 70  
 GmPTS-T1 MANSK-TL.SSTFF-FPI.TI.TFL.FS.FI.VTANYQNT.PP.TYI.GFRE.KI.TH.PHY.FH.VVTSQK.FSLVAT--EPI.KGKSNCP 77  
 GmPTS-L2 MAKSKNLYIFT--IVLTLLEFSFATAKSHSFRHSISPTALGLQKEKLSLHFFHHVVTGPKETAVRVA--QAHMTNTSS 76  
 GmPTS-L3 MANTKHLTPTT--IVLTLLEFSFATAK-----SPTALGLVQKEKLSLHFFHHVVTGPKETAVRVA--QAHMTNTSS 68  
 GmPTS-L4 MANF---ITFFIP--LALTLLEFSLVTASYQHSISPSLLRS--REKLTLHFFHHVVTGPKESMVIVA--DPPKVVADSP 71  
 GmPTS-L5 MANF---KTFISQTLTLLTLLFSLVATYIHINISPSLVRS--REKLTLHFFHHVVTGPKESMVIVA--DPPKVVADSP 73  
 LjPTS1 MAKSKALMPTFFLSLNLFLF--FSSVVTASYKTI.SPTL.LGFREKFTLHFFHHVVTGPKESMVIVA--EPNGKAFNS 76  
 LjPTS-L1 MTNSSKTI.SATLLVLSLALITLFPSSVTNASYEKISPTQLGFKEEKLTLHFFHHVVTGPKESMVIVSVEPIKDKSKSP 80  
 LjPTS-L2 MTNS-KALCS---TFLINLFLF.SMSYASYYENLSP.TLGLQKEKLSLHFFHHVVTGPKETMIVSVEPLKGSKSP 75  
 McPTS1 MAKSSTFFPITLLISLNLFLSISLTLTATNYQSLSP.TMLGFQEEKFTLHFFHHVVTGPKESMVIVA--EPNGKAVNA 78  
 VrPTS1 MAKS-----TIFLCLNLSL---ISLVTATYYQSLA.PLMGFREKFTLHFFHHVVTGPKESMVIVA--EPNGKAKDA 70  
 VuPTS1 MANS-----TIFLCLNLSL---ISLVTATYYQSLA.PLMGFREKFTLHFFHHVVTGPKESMVIVA--EPNGKAKDA 70  
 GsPTS1 MAKS-----TFFVCLNLSL---FSLVATYYSSITPTL.LGFREKFTLHFFHHVVTGPKESMVIVA--EPNGKAKDA 70  
 VaPTS1 MANS-----TIFLCLNLSL---ISLVTATYYQSLA.PLMGFREKFTLHFFHHVVTGPKESMVIVA--EPNGKAKDA 70  
 PvPTS1 MAKS-----TFFVCLNLSL---ISAVTASYQSI.TPTL.MGFREKFTLHFFHHVVTGPKESMVIVA--EPNGKAKDA 70  
 TsPTS1 -----MLGFQEEKFTLHFFHHVVTGPKESMVIVA--EPNGKAVNA 40  
 ApPTS1 MDNSK-TFLPTFI-IPITLTFIFLSTASATYRNTSPTYI.GFRE.KI.TH.HFY.HH.VVTSQK.FSLVAT--EPI.KGKSNCP 77  
 CcPTS1 MAKT-----TIFLPTFI-IPITLTFIFLSTASATYRNTSPTYI.GFRE.KI.TH.HFY.HH.VVTSQK.FSLVAT--EPI.KGKSNCP 77  
 MpPTS1 MAKSRAVLVLSLMLCLN---L---LCVVKGSYYSSLAPTL.LGFREKFTLHFFHHVVTGPKESMVIVA--EPNGKAKDS 72  
 SsPTS1 MAKS-----TFFVCLNLSL---FSLVATYYQSI.APTL.LGFQEEKFTLHFFHHVVTGPKESMVIVA--EPNGKAKDA 70

F75 P83 T86 S93 Y103 N137 R145

GePTS1 LPFGTVVAMDPLTVGPEPDSKLVGKAQGIH.TSISQ---EEMGLMMVMTMAFDGDFNGSTISVLGRMIMSEPVREMAI 149  
 PsPTS1 LPFGTVVAMDPLTAGPERDSKLVGKAQGIH.TSISQ---EEMGLMMVMTMAFDGDFNGSTISVLGRMIMSEPVREMAI 148  
 PsPTS2 LPFGSIVVLEPLTVGPELNSLIGKAQGFIVTVSQAQVLELEIVMGMTLFAFDGDFNGSTISVLGRMIMSEPVREMAI 154  
 CaPTS1 LPFGTVVAMDPLTAGPERDSKLVGKAQGIH.TSISQ---EEMGLMMVMTMAFDGDFNGSTISVLGRMIMSEPVREMAI 151  
 GmPTS1 LPFGTVVAMDPLTVGPEPDSKLVGKAQGIH.TSISQ---EEMGLMMVMTMAFDGDFNGSTISVLGRMIMSEPVREMAI 147  
 GmPTS2 LPFGTVVAMDPLTVGPEPDSKLVGKAQGIH.TSISQ---EEMGLMMVMTMAFDGDFNGSTISVLGRMIMSEPVREMAI 147  
 GmPTS3 LPFGTVVAMDPLTVGPEPDSKLVGKAQGIH.TSISQ---EEMGLMMVMTMAFDGDFNGSTISVLGRMIMSEPVREMAI 147  
 GmPTS4 LPFGTVVAMDPLTVGPEPDSKLVGKAQGIH.TSISQ---EEMGLMMVMTMAFDGDFNGSTISVLGRMIMSEPVREMAI 147  
 GmPTS-L1 LPFGSIVVLEPLTVGPELNSLIGKAQGFIVTVSQAQVLELEIVMGMTLFAFDGDFNGSTISVLGRMIMSEPVREMAI 156  
 GmPTS-L2 AFDGTVVAMDPLTVGPEPDSKLVGKAQGIH.GFASQ---EDVGLLIMMNFAPTEGKYNGSTISVLGRMIMSEPVREMAI 152  
 GmPTS-L3 TFLGLMMDPLTVGPEPDSKLVGKAQGIH.GFASQ---EDMGLLIMMNFAPTEGKYNGSTISVLGRMIMSEPVREMAI 144  
 GmPTS-L4 LPFGSIVVLEPLTVGPELNSLIGKAQGFIVTVSQAQVLELEIVMGMTLFAFDGDFNGSTISVLGRMIMSEPVREMAI 150  
 GmPTS-L5 LPFGSIVVLEPLTVGPELNSLIGKAQGFIVTVSQAQVLELEIVMGMTLFAFDGDFNGSTISVLGRMIMSEPVREMAI 152  
 LjPTS1 LPFGTVVAMDPLTAGPERDSKLVGKAQGIH.TSISQNTFDDMGLMMVMTLAFSEGEFNGSTLCCMGRMIMSEPVREMAI 156  
 LjPTS-L1 LPFGSIVVLEPLTVGPELNSLIGKAQGFIVTVSQAQVLELEIVMGMTLFAFDGDFNGSTISVLGRMIMSEPVREMAI 159  
 LjPTS-L2 LPFGSIVVLEPLTVGPELNSLIGKAQGFIVTVSQAQVLELEIVMGMTLFAFDGDFNGSTISVLGRMIMSEPVREMAI 154  
 McPTS1 LPFGTVVAMDPLTAGPERDSKLVGKAQGIH.TSISQ---EEMGLMMVMTMAFDGDFNGSTISVLGRMIMSEPVREMAI 155  
 VrPTS1 LPFGTVVAMDPLTAGPERDSKLVGKAQGIH.TSISQ---EEMGLMMVMTMAFDGDFNGSTISVLGRMIMSEPVREMAI 147  
 VuPTS1 LPFGTVVAMDPLTAGPERDSKLVGKAQGIH.TSISQ---EEMGLMMVMTMAFDGDFNGSTISVLGRMIMSEPVREMAI 147  
 GsPTS1 LPFGTVVAMDPLTVGPEPDSKLVGKAQGIH.TSISQ---EEMGLMMVMTMAFDGDFNGSTISVLGRMIMSEPVREMAI 147  
 VaPTS1 LPFGTVVAMDPLTAGPERDSKLVGKAQGIH.TSISQ---EEMGLMMVMTMAFDGDFNGSTISVLGRMIMSEPVREMAI 147  
 PvPTS1 LPFGTVVAMDPLTAGPERDSKLVGKAQGIH.TSISQ---EEMGLMMVMTMAFDGDFNGSTISVLGRMIMSEPVREMAI 147  
 TsPTS1 LPFGTVVAMDPLTAGPERDSKLVGKAQGIH.TSISQ---EEMGLMMVMTMAFDGDFNGSTISVLGRMIMSEPVREMAI 117  
 ApPTS1 LPFGSIVVLEPLTVGPELNSLIGKAQGFIVTVSQAQVLELEIVMGMTLFAFDGDFNGSTISVLGRMIMSEPVREMAI 156  
 CcPTS1 LPFGTVVAMDPLTAGPERDSKLVGKAQGIH.TSISQ---EEMGLMMVMTMAFDGDFNGSTISVLGRMIMSEPVREMAI 147  
 MpPTS1 LPFGTVVAMDPLTAGPERDSKLVGKAQGIH.TSISQ---EEMGLMMVMTMAFDGDFNGSTISVLGRMIMSEPVREMAI 149  
 SsPTS1 LPFGTVVAMDPLTAGPERDSKLVGKAQGIH.TSISQ---EEMGLMMVMTMAFDGDFNGSTISVLGRMIMSEPVREMAI 147

Y181

GePTS1 VGGTGAFFRARGYAQAQKPFYSVDFTKGDAIVEYDVFVHY----- 188  
 PsPTS1 VGGTGAFFRARGYAQAQKPFYSVDFTKGDAIVEYDVFVHY----- 187  
 PsPTS2 IGGTGEFRARGYLAQKSHAVDYHGDHVEINNVYVFHYPTSSS--SEDFEEGSRFMKEPIFGQI 218  
 CaPTS1 VGGTGAFFRARGYAQAQKPFYSVDFTKGDAIVEYDVFVHY----- 190  
 GmPTS1 VGGTGAFFRARGYAQAQKPFYSVDFTKGDAIVEYDVFVHY----- 186  
 GmPTS2 VGGTGAFFRARGYAQAQKPFYSVDFTKGDAIVEYDVFVHY----- 186  
 GmPTS3 VGGTGAFFRARGYAQAQKPFYSVDFTKGDAIVEYDVFVHY----- 186  
 GmPTS4 VGGTGAFFRARGYAQAQKPFYSVDFTKGDAIVEYDVFVHY----- 186  
 GmPTS-L1 IGGTGAFFRARGYAQAQKPFYSVDFTKGDAIVEYDVFVHYSSH--E--DFN----- 202  
 GmPTS-L2 VGGSGAFFRARGYAQAQKTHITFDYKTCDAVEINNVYVFHY----- 191  
 GmPTS-L3 VGGSGAFFRARGYAQAQKTHITFDYKTCDAVEINNVYVLIY----- 183  
 GmPTS-L4 IGGTGEFRARGYILARSVKVDYHKGDAIVEYDVFVHYSSSSSS--HEIFNDGVQFMTDPIILSKI 215  
 GmPTS-L5 IGGTGEFRARGYILARSVKVDYHKGDAIVEYDVFVHYSSSSSSPHILFNQGLILCHGDY--- 214  
 LjPTS1 VGGTGAFFRARGHTEGKPFHSVDFTKGDAIVEYDVFVHY----- 195  
 LjPTS-L1 VGGTGAFFRARGFVQPKTYQVDYKGDAVEINNVYVFHYTSPSSS--WDV----- 207  
 LjPTS-L2 TGGTGAFFRARGFVQPKTHQVDYKGDAVEINNVYVFHYTSPSSS--QEVFSDGTQPMADPIILSKN 218  
 McPTS1 VGGTGAFFRARGYAQAQKPFYSVDFTKGDAIVEYDVFVHY----- 194  
 VrPTS1 VGGTGAFFRARGYAQAQKPFYSVDFTKGDAIVEYDVFVHY----- 186  
 VuPTS1 VGGTGAFFRARGYAQAQKPFYSVDFTKGDAIVEYDVFVHY----- 186  
 GsPTS1 VGGTGAFFRARGYAQAQKPFYSVDFTKGDAIVEYDVFVHY----- 186  
 VaPTS1 VGGTGAFFRARGYAQAQKPFYSVDFTKGDAIVEYDVFVHY----- 186  
 PvPTS1 VGGTGAFFRARGYAQAQKPFYSVDFTKGDAIVEYDVFVHY----- 186  
 TsPTS1 VGGTGAFFRARGYAQAQKPFYSVDFTKGDAIVEYDVFVHY----- 156  
 ApPTS1 IGGTGAFFRARGFVQPKTYQVDYKGDAVEINNVYVFHYSSS--S--QEPFNEGLQFMTDPIILSKM 218  
 CcPTS1 IGGTGAFFRARGYAQAQKPFYSVDFTKGDAIVEYDVFVHY----- 187  
 MpPTS1 VGGTGAFFRARGYAQAQKPFYSVDFTKGDAIVEYDVFVHY----- 201  
 SsPTS1 VGGTGAFFRARGYAQAQKPFYSVDFTKGDAIVEYDVFVHY----- 186

**Figure S6. Amino acid sequence alignment of PTS from Leguminosae.** Alignment was created using Clustal Omega. ApPTS1 (Indian licorice, *Abrus precatorius*, XP\_027352715.1), CaPTS1 (*Cicer arietinum*, XP\_004493624.1), CcPTS1 (chickpea, *Cajanus cajan*, XP\_020213585.1), GePTS1 (*Glycyrrhiza echinata*), GmPTS1 (soybean, *Glycine max*, NP\_001236934), GmPTS2 (GR830455), GmPTS3 (XP\_003554228.1), GmPTS4 (NP\_001353981.1), GmPTS-L1 (XP\_003521234.1), GmPTS-L2 (XP\_003554226.1), GmPTS-L3 (XP\_003554227.1), GmPTS-L4 (NP\_001236116.2), GmPTS-L5 (NP\_001236254.2), GsPTS1 (*Glycine soja*, XP\_028225437.1), LjPTS1 (*Lotus japonica*, FS322418), LjPTS-L1 (AFK47764.1), LjPTS-L2 (AFK41387.1), MpPTS1 (*Mucuna pruriens*, RDX58397.1), MtPTS1 (*Medicago truncatula*, XP\_003625317.1), PsPTS1 and PsPTS2 (*Pisum sativum*), PvPTS1 (*Phaseolus vulgaris*, XP\_007162362.1), SsPTS1 (*Spatholobus suberectus*, TKY62509.1), TsPTS1 (*Trifolium subterraneum*, GAU31514.1), VaPTS1 (adzuki bean, *Vigna angularis*, XP\_017417783.1), VrPTS1 (mung bean, *Vigna radiata* var. *radiata*, XP\_014495568.1), VuPTS1 (cowpea, *Vigna unguiculata*, XP\_027939702.1).

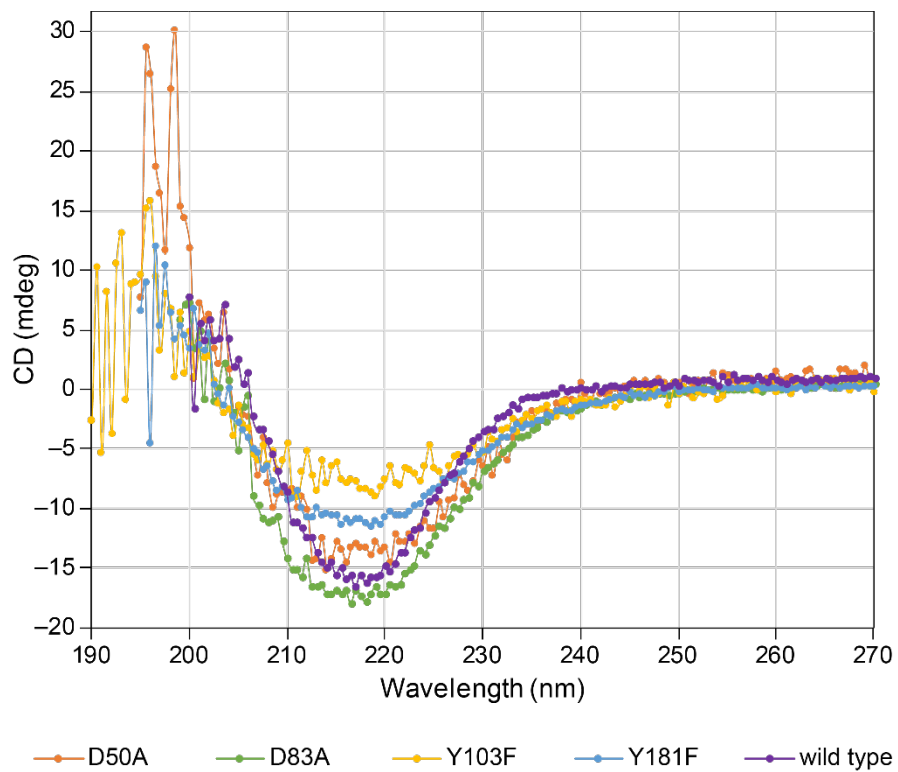

**Figure S7.** Circular dichroism spectra of GePTS1 wild type and corresponding mutants in 20 mM Tris-HCl, pH 7.9, 25 °C, normalized to reported concentrations

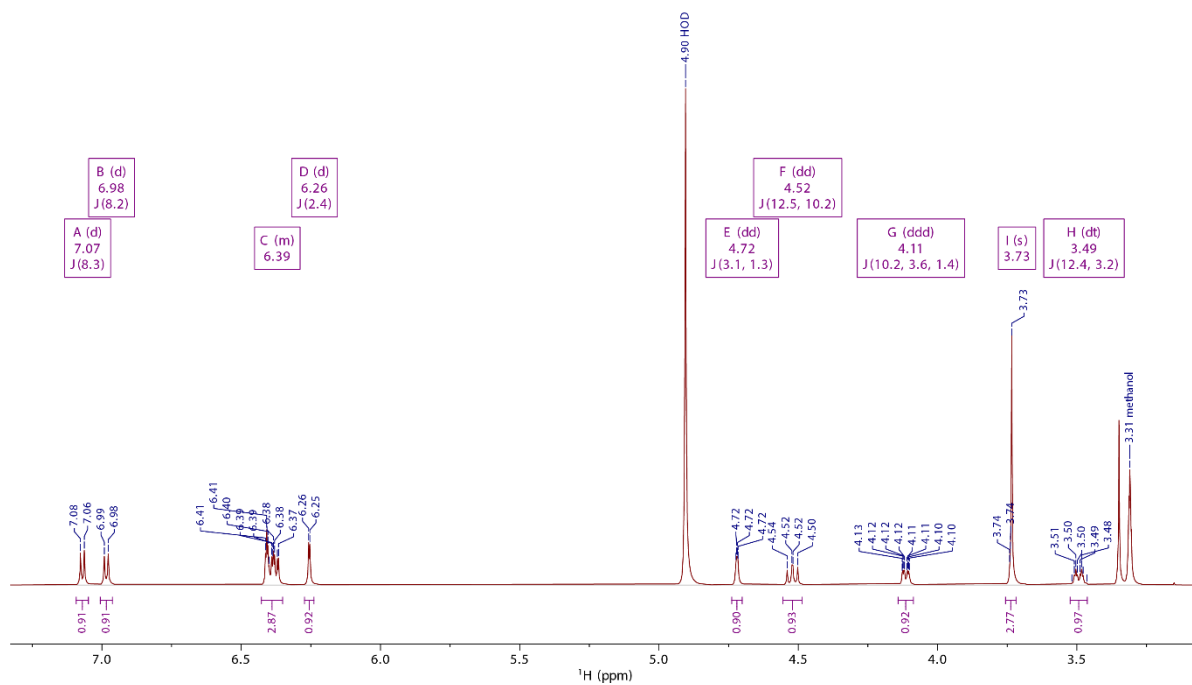

**Figure S8.** 1D  $^1\text{H}$  NMR spectrum of *cis*-DMI in methanol- $d_4$  showing primary product multiplet analysis performed with MestreNova 14.0.1 (Mestrelab Research, S.L.). See Figure S10 for J-resolved spectrum of the multiplet at 6.39 ppm.

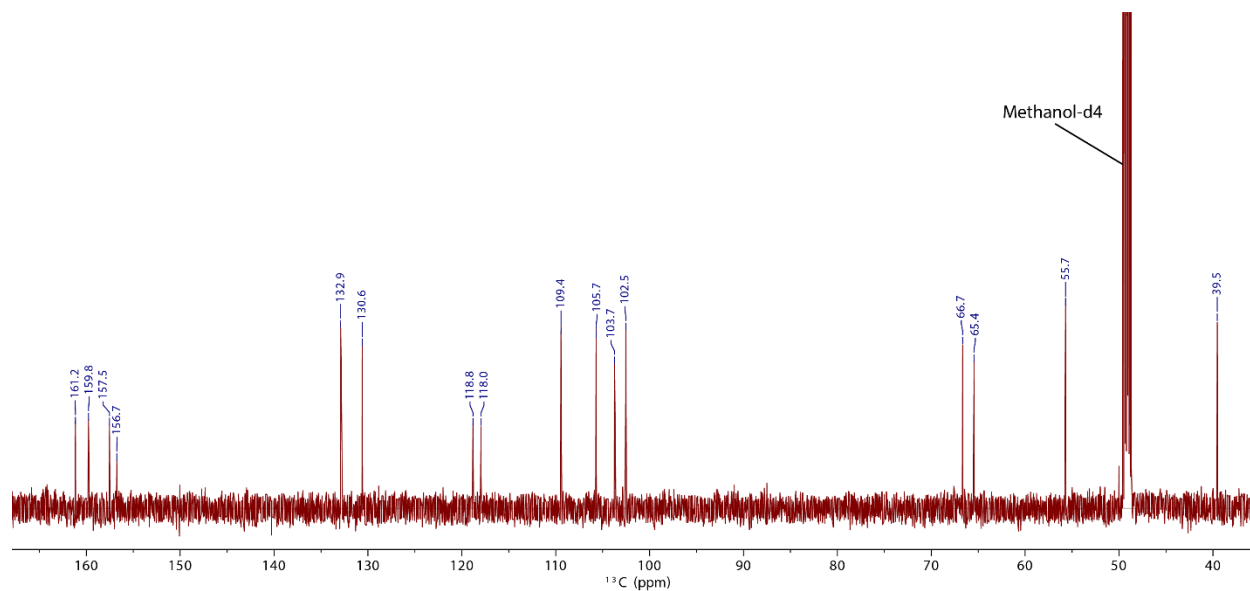

**Figure S9** 1D  $^{13}\text{C}$  NMR spectrum of *cis*-DMI in methanol- $d_4$ .

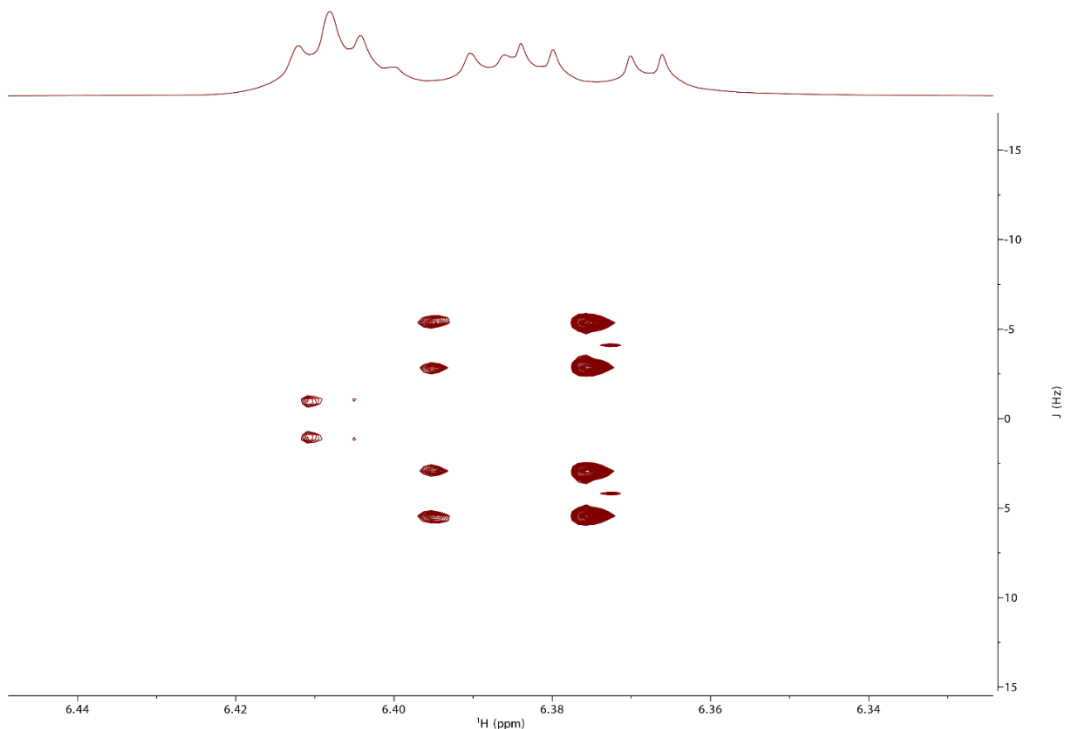

**Figure S10.** Portion of the 2D  $^1\text{H}$  HOMO2DJ NMR spectrum of *cis*-DMI showing the overlapped multiplet at 6.39 ppm is comprised of peaks at 6.37 ppm (1 H, dd,  $J = 2.5$  and 8.3 Hz), 6.39 ppm (1 H, dd,  $J = 2.5$  and 8.5 Hz), and 6.41 ppm (d,  $J = 2.1$  Hz).

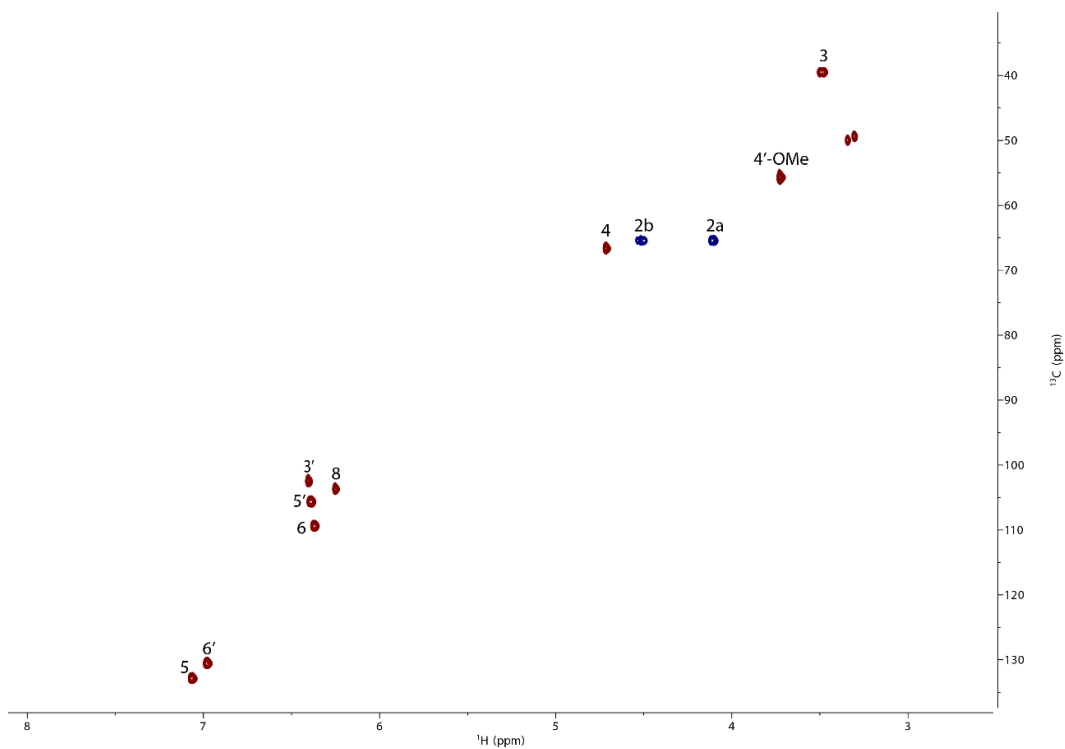

**Figure S11.** 2D multiplicity edited [CH, CH<sub>3</sub> up (red), CH<sub>2</sub> down (blue)] gHSQC NMR spectrum of *cis*-DMI annotated with assignments.

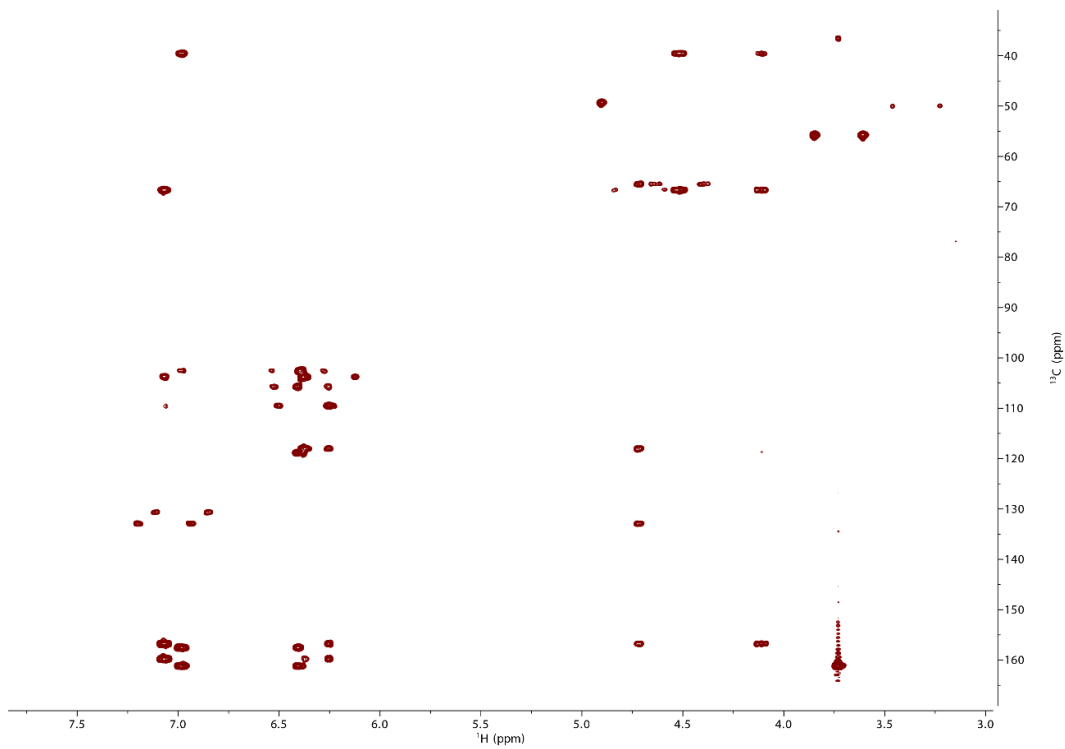

Figure S12. 2D gHMBCAD NMR spectrum of *cis*-DMI.

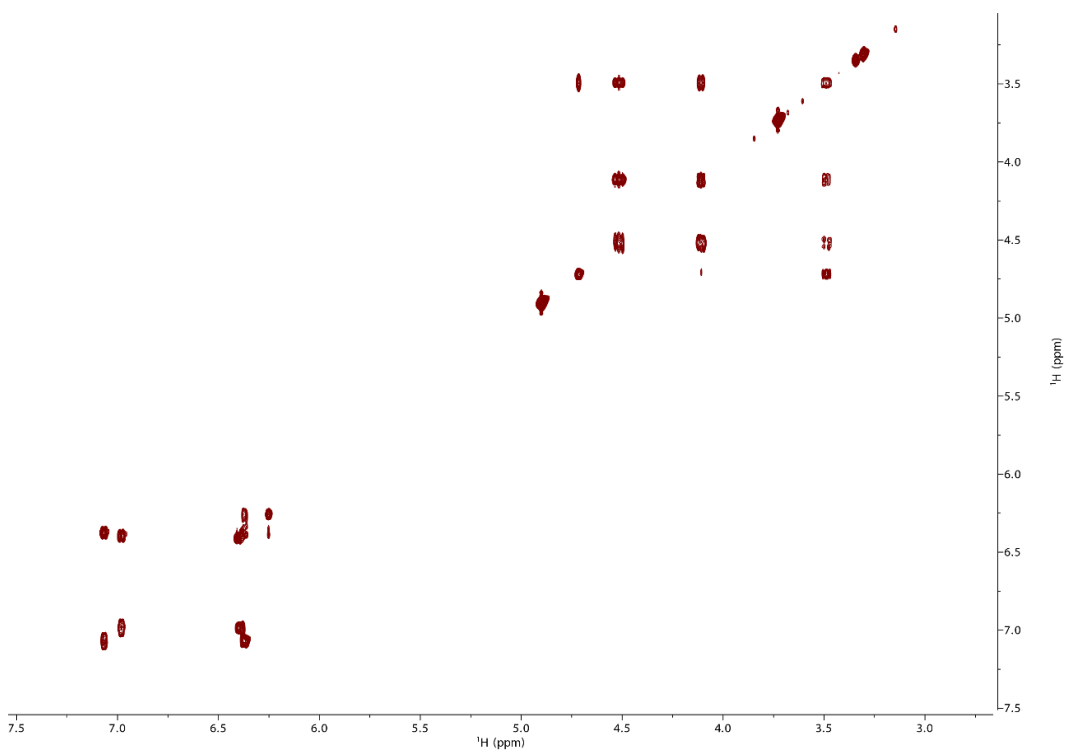

Figure S13. 2D gCOSY NMR spectrum of *cis*-DMI

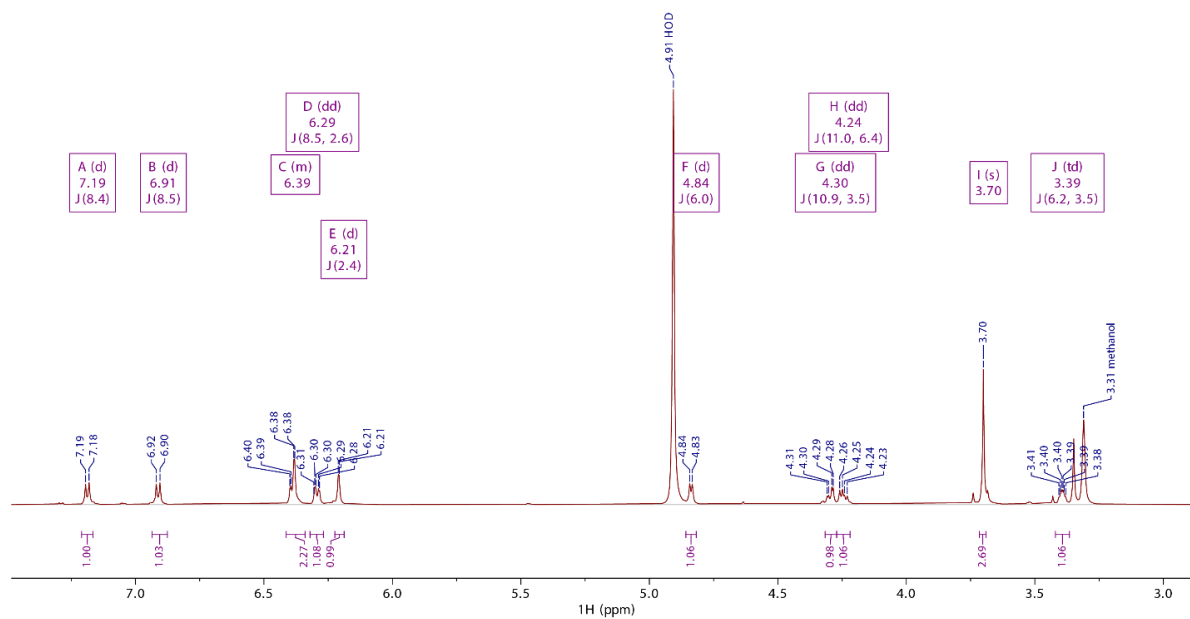

**Figure S14.** 1D  $^1\text{H}$  NMR spectrum of *trans*-DMI in methanol- $d_4$  showing primary product multiplet analysis performed in MestreNova 14.0.1 (Mestrelab Research, S.L.). The multiplet centered at 6.39 ppm consists of peaks at 6.40 (1H, dd,  $J = 2.4, 8.7$  Hz) and 6.38 (1H, d,  $J = 2.7$  Hz) ppm.

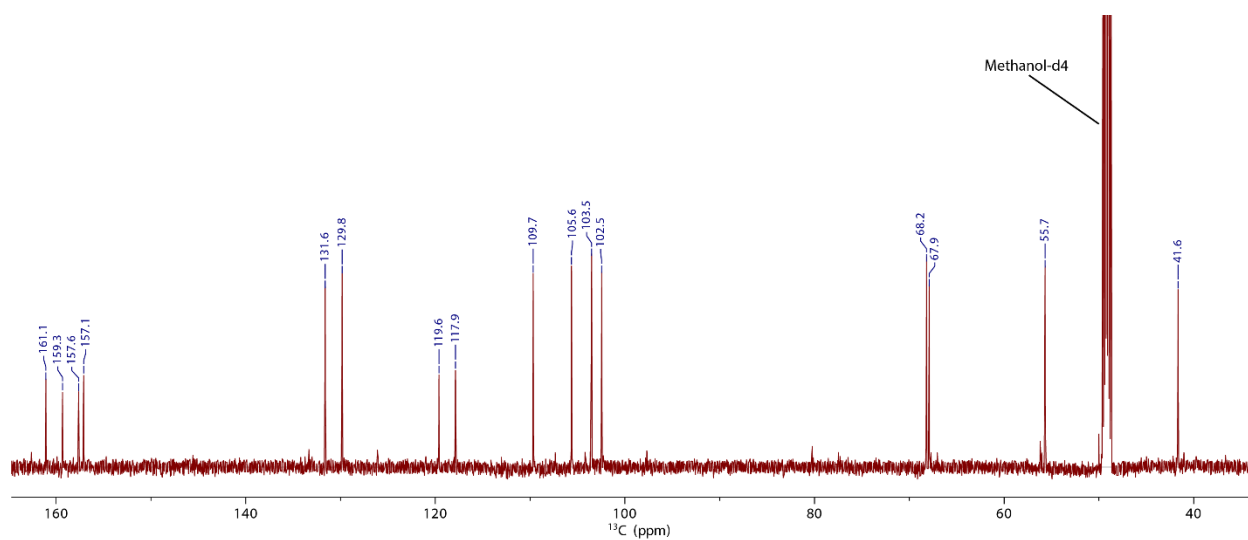

**Figure S15.** 1D  $^{13}\text{C}$  NMR spectrum of *trans*-DMI in methanol- $d_4$ .

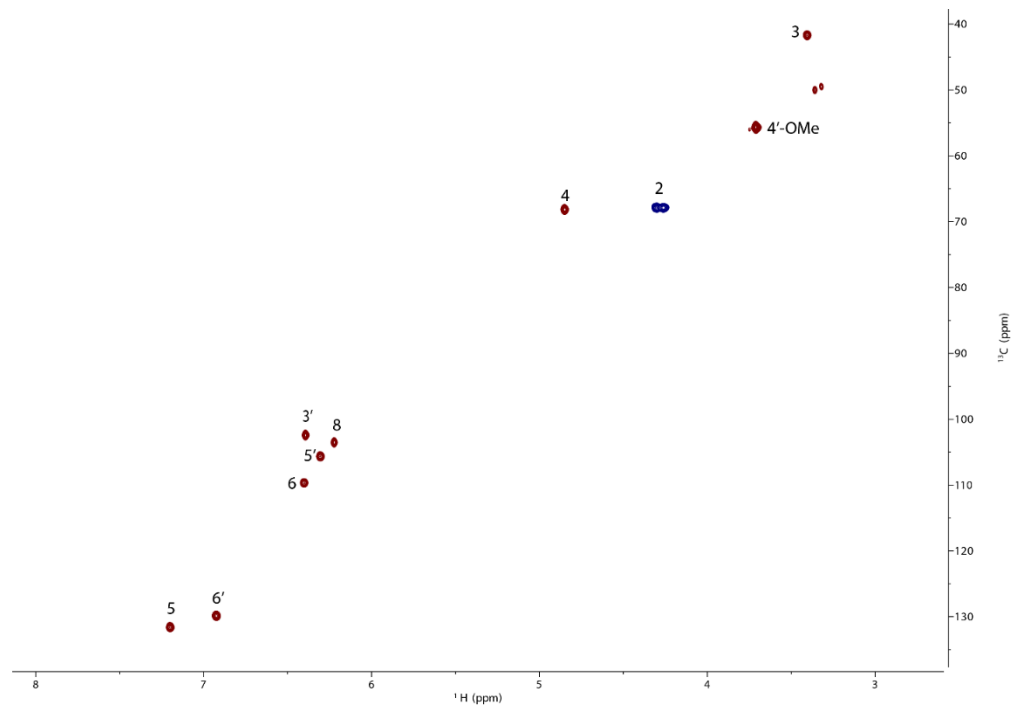

**Figure S16.** 2D multiplicity-edited [CH, CH<sub>3</sub> up (red), CH<sub>2</sub> down (blue)] gHSQCAD NMR spectrum of *trans*-DMI annotated with assignments.

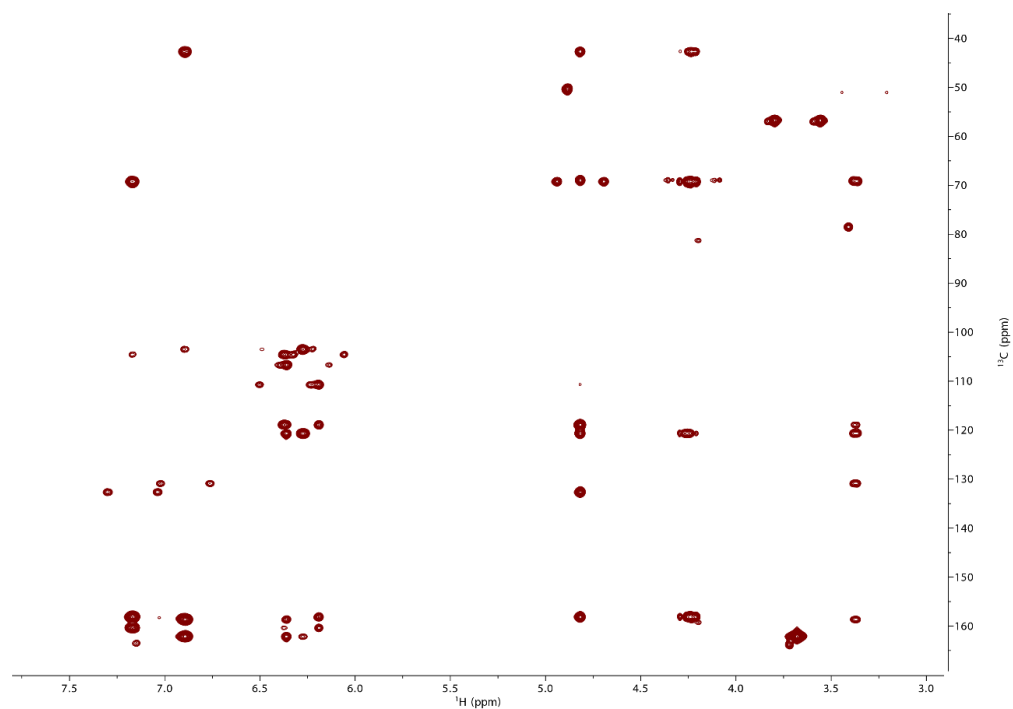

**Figure S17.** 2D gHMBCAD NMR spectrum of *trans*-DMI.



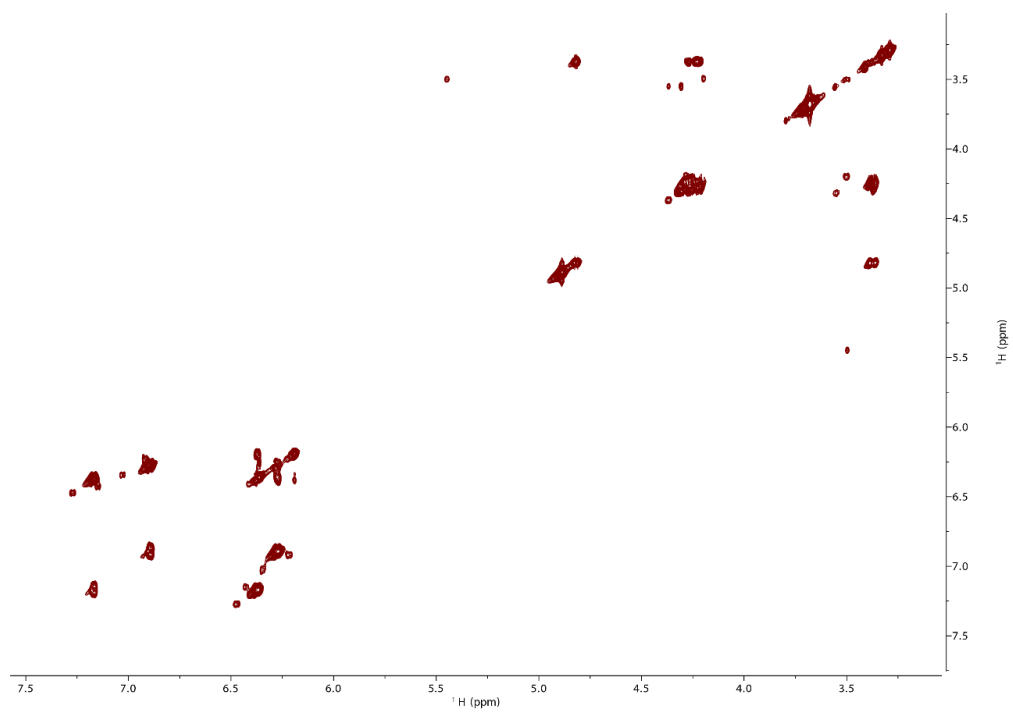

**Figure S18.** 2D gCOSY NMR spectrum of *trans*-DMI.
